# Supplementary material
Source: PubMed Central journal article supplement (PMC7000981)
Supplement: JVI.00927-19-s0001.pdf [file JVI.00927-19-s0001.pdf]

## Supplementary Tables

| Term                                                           | Count | %    | P-Value  | Bonferroni | Benjamini |
|----------------------------------------------------------------|-------|------|----------|------------|-----------|
| cellular macromolecule biosynthetic process                    | 26    | 72.2 | 1.80E-07 | 2.30E-04   | 3.30E-05  |
| nucleic acid-templated transcription                           | 23    | 63.9 | 1.60E-07 | 2.00E-04   | 3.30E-05  |
| regulation of RNA metabolic process                            | 23    | 63.9 | 1.50E-07 | 1.90E-04   | 3.80E-05  |
| gene expression                                                | 27    | 75   | 9.50E-08 | 1.20E-04   | 4.00E-05  |
| regulation of gene expression                                  | 24    | 66.7 | 3.80E-07 | 4.80E-04   | 4.00E-05  |
| cellular biosynthetic process                                  | 28    | 77.8 | 3.70E-07 | 4.70E-04   | 4.30E-05  |
| transcription, DNA-templated                                   | 23    | 63.9 | 6.70E-08 | 8.50E-05   | 4.30E-05  |
| cellular nitrogen compound biosynthetic process                | 26    | 72.2 | 1.40E-07 | 1.70E-04   | 4.40E-05  |
| RNA metabolic process                                          | 26    | 72.2 | 3.60E-08 | 4.50E-05   | 4.50E-05  |
| macromolecule biosynthetic process                             | 26    | 72.2 | 3.60E-07 | 4.60E-04   | 4.60E-05  |
| nucleic acid metabolic process                                 | 26    | 72.2 | 3.40E-07 | 4.30E-04   | 4.70E-05  |
| RNA biosynthetic process                                       | 23    | 63.9 | 3.00E-07 | 3.80E-04   | 4.80E-05  |
| regulation of nitrogen compound metabolic process              | 24    | 66.7 | 5.00E-07 | 6.30E-04   | 4.80E-05  |
| biosynthetic process                                           | 28    | 77.8 | 7.90E-07 | 9.90E-04   | 6.60E-05  |
| regulation of nucleobase-containing compound metabolic process | 23    | 63.9 | 7.60E-07 | 9.70E-04   | 6.90E-05  |
| nitrogen compound metabolic process                            | 29    | 80.6 | 1.20E-06 | 1.50E-03   | 9.10E-05  |
| cellular nitrogen compound metabolic process                   | 28    | 77.8 | 1.50E-06 | 1.90E-03   | 1.10E-04  |
| aromatic compound biosynthetic process                         | 23    | 63.9 | 3.00E-06 | 3.80E-03   | 1.50E-04  |
| negative regulation of RNA metabolic process                   | 13    | 36.1 | 3.00E-06 | 3.70E-03   | 1.60E-04  |
| regulation of RNA biosynthetic process                         | 21    | 58.3 | 2.90E-06 | 3.60E-03   | 1.60E-04  |
| regulation of transcription, DNA-templated                     | 21    | 58.3 | 2.40E-06 | 3.00E-03   | 1.60E-04  |
| regulation of nucleic acid-templated transcription             | 21    | 58.3 | 2.60E-06 | 3.30E-03   | 1.60E-04  |
| nucleobase-containing compound biosynthetic process            | 23    | 63.9 | 2.30E-06 | 2.90E-03   | 1.60E-04  |
| organic substance biosynthetic process                         | 27    | 75   | 3.30E-06 | 4.20E-03   | 1.60E-04  |

|                                                                         |    |      |          |          |          |
|-------------------------------------------------------------------------|----|------|----------|----------|----------|
| regulation of cellular macromolecule biosynthetic process               | 22 | 61.1 | 2.50E-06 | 3.20E-03 | 1.60E-04 |
| heterocycle biosynthetic process                                        | 23 | 63.9 | 2.80E-06 | 3.60E-03 | 1.60E-04 |
| nucleobase-containing compound metabolic process                        | 26 | 72.2 | 3.90E-06 | 4.90E-03 | 1.80E-04 |
| regulation of macromolecule metabolic process                           | 26 | 72.2 | 4.20E-06 | 5.30E-03 | 1.80E-04 |
| regulation of macromolecule biosynthetic process                        | 22 | 61.1 | 4.20E-06 | 5.30E-03 | 1.90E-04 |
| organic cyclic compound biosynthetic process                            | 23 | 63.9 | 4.70E-06 | 5.90E-03 | 2.00E-04 |
| transcription from RNA polymerase II promoter                           | 15 | 41.7 | 5.00E-06 | 6.30E-03 | 2.00E-04 |
| heterocycle metabolic process                                           | 26 | 72.2 | 6.00E-06 | 7.60E-03 | 2.40E-04 |
| cellular aromatic compound metabolic process                            | 26 | 72.2 | 7.00E-06 | 8.90E-03 | 2.70E-04 |
| regulation of cellular biosynthetic process                             | 22 | 61.1 | 8.50E-06 | 1.10E-02 | 3.10E-04 |
| negative regulation of nucleobase-containing compound metabolic process | 13 | 36.1 | 8.40E-06 | 1.10E-02 | 3.10E-04 |
| regulation of biosynthetic process                                      | 22 | 61.1 | 1.10E-05 | 1.30E-02 | 3.70E-04 |
| organic cyclic compound metabolic process                               | 26 | 72.2 | 1.30E-05 | 1.60E-02 | 4.50E-04 |
| regulation of metabolic process                                         | 26 | 72.2 | 1.40E-05 | 1.80E-02 | 4.70E-04 |
| regulation of primary metabolic process                                 | 25 | 69.4 | 1.90E-05 | 2.40E-02 | 6.10E-04 |
| negative regulation of gene expression                                  | 13 | 36.1 | 1.90E-05 | 2.40E-02 | 6.20E-04 |
| negative regulation of nitrogen compound metabolic process              | 13 | 36.1 | 2.20E-05 | 2.70E-02 | 6.70E-04 |
| regulation of cellular metabolic process                                | 25 | 69.4 | 2.20E-05 | 2.80E-02 | 6.80E-04 |
| COPI coating of Golgi vesicle                                           | 3  | 8.3  | 2.40E-05 | 3.00E-02 | 7.00E-04 |
| COPI-coated vesicle budding                                             | 3  | 8.3  | 2.40E-05 | 3.00E-02 | 7.00E-04 |
| Golgi transport vesicle coating                                         | 3  | 8.3  | 2.40E-05 | 3.00E-02 | 7.00E-04 |
| macromolecule metabolic process                                         | 31 | 86.1 | 2.70E-05 | 3.30E-02 | 7.70E-04 |

|                                                                      |    |      |          |          |          |
|----------------------------------------------------------------------|----|------|----------|----------|----------|
| regulation of transcription from RNA polymerase II promoter          | 14 | 38.9 | 3.10E-05 | 3.80E-02 | 8.70E-04 |
| positive regulation of gene expression                               | 13 | 36.1 | 7.00E-05 | 8.40E-02 | 1.90E-03 |
| cellular metabolic process                                           | 32 | 88.9 | 8.10E-05 | 9.70E-02 | 2.20E-03 |
| cellular macromolecule metabolic process                             | 29 | 80.6 | 9.40E-05 | 1.10E-01 | 2.50E-03 |
| metabolic process                                                    | 33 | 91.7 | 1.20E-04 | 1.40E-01 | 3.10E-03 |
| regulation of mRNA metabolic process                                 | 5  | 13.9 | 1.50E-04 | 1.70E-01 | 3.70E-03 |
| Golgi vesicle budding                                                | 3  | 8.3  | 1.80E-04 | 2.00E-01 | 4.40E-03 |
| organic substance metabolic process                                  | 32 | 88.9 | 2.90E-04 | 3.10E-01 | 7.10E-03 |
| negative regulation of transcription, DNA-templated                  | 10 | 27.8 | 3.10E-04 | 3.20E-01 | 7.40E-03 |
| positive regulation of RNA metabolic process                         | 11 | 30.6 | 3.50E-04 | 3.60E-01 | 8.20E-03 |
| negative regulation of macromolecule metabolic process               | 14 | 38.9 | 3.60E-04 | 3.70E-01 | 8.20E-03 |
| regulation of mRNA splicing, via spliceosome                         | 4  | 11.1 | 3.80E-04 | 3.80E-01 | 8.50E-03 |
| negative regulation of cellular metabolic process                    | 14 | 38.9 | 3.90E-04 | 3.90E-01 | 8.60E-03 |
| negative regulation of nucleic acid-templated transcription          | 10 | 27.8 | 4.20E-04 | 4.10E-01 | 9.10E-03 |
| negative regulation of RNA biosynthetic process                      | 10 | 27.8 | 4.70E-04 | 4.50E-01 | 9.90E-03 |
| positive regulation of nitrogen compound metabolic process           | 12 | 33.3 | 4.90E-04 | 4.60E-01 | 1.00E-02 |
| iron-sulfur cluster assembly                                         | 3  | 8.3  | 5.30E-04 | 4.90E-01 | 1.10E-02 |
| metallo-sulfur cluster assembly                                      | 3  | 8.3  | 5.30E-04 | 4.90E-01 | 1.10E-02 |
| negative regulation of transcription from RNA polymerase II promoter | 8  | 22.2 | 6.30E-04 | 5.50E-01 | 1.30E-02 |
| negative regulation of metabolic process                             | 14 | 38.9 | 8.00E-04 | 6.40E-01 | 1.60E-02 |
| sulfur compound metabolic process                                    | 6  | 16.7 | 8.50E-04 | 6.60E-01 | 1.70E-02 |
| positive regulation of macromolecule biosynthetic process            | 11 | 30.6 | 9.10E-04 | 6.90E-01 | 1.80E-02 |

|                                                                         |    |      |          |          |          |
|-------------------------------------------------------------------------|----|------|----------|----------|----------|
| negative regulation of cellular macromolecule biosynthetic process      | 10 | 27.8 | 9.90E-04 | 7.10E-01 | 1.90E-02 |
| RNA splicing                                                            | 6  | 16.7 | 1.20E-03 | 7.80E-01 | 2.20E-02 |
| regulation of mRNA processing                                           | 4  | 11.1 | 1.20E-03 | 7.80E-01 | 2.20E-02 |
| positive regulation of nucleobase-containing compound metabolic process | 11 | 30.6 | 1.20E-03 | 7.90E-01 | 2.20E-02 |
| regulation of RNA splicing                                              | 4  | 11.1 | 1.40E-03 | 8.20E-01 | 2.50E-02 |
| negative regulation of biological process                               | 19 | 52.8 | 1.50E-03 | 8.50E-01 | 2.60E-02 |
| negative regulation of macromolecule biosynthetic process               | 10 | 27.8 | 1.60E-03 | 8.70E-01 | 2.80E-02 |
| positive regulation of cellular biosynthetic process                    | 11 | 30.6 | 1.70E-03 | 8.80E-01 | 2.90E-02 |
| positive regulation of biosynthetic process                             | 11 | 30.6 | 1.90E-03 | 9.10E-01 | 3.20E-02 |
| primary metabolic process                                               | 30 | 83.3 | 2.00E-03 | 9.20E-01 | 3.20E-02 |
| RNA processing                                                          | 8  | 22.2 | 2.00E-03 | 9.20E-01 | 3.20E-02 |
| negative regulation of cellular process                                 | 18 | 50   | 1.90E-03 | 9.10E-01 | 3.20E-02 |
| negative regulation of cellular biosynthetic process                    | 10 | 27.8 | 2.20E-03 | 9.40E-01 | 3.40E-02 |
| mRNA processing                                                         | 6  | 16.7 | 2.40E-03 | 9.50E-01 | 3.80E-02 |
| negative regulation of biosynthetic process                             | 10 | 27.8 | 2.40E-03 | 9.50E-01 | 3.80E-02 |
| negative regulation of mRNA metabolic process                           | 3  | 8.3  | 2.50E-03 | 9.60E-01 | 3.90E-02 |
| positive regulation of macromolecule metabolic process                  | 14 | 38.9 | 2.60E-03 | 9.60E-01 | 3.90E-02 |

**Table S1. Gene ontology enrichment of 37 cellular genes in the Zta-interactome.**
